# Supplementary material for: Unusual formation of hollow NiCoO2 sub-microspheres by oxygen functional group dominated thermally induced mass relocation towards efficient lithium storage
Source: Royal Society of Chemistry journal article supplement (doi:10.1039/c9ta06432j), 2019-01-01
Supplement: c9ta06432j1.pdf [file c9ta06432j1.pdf]

## Electronic Supplementary Information (ESI)

**Unusual formation of hollow NiCoO<sub>2</sub> sub-microspheres by oxygen functional groups dominated thermally induced mass relocation towards efficient lithium storage**

Zhengluo Wang,<sup>a, b</sup> Dienguila Kionga Denis,<sup>a</sup> Zhiwei Zhao,<sup>b</sup> Xuan Sun,<sup>a</sup> Jinyang

Zhang,<sup>a</sup> Linrui Hou,<sup>a</sup> Changzhou Yuan<sup>a, b\*</sup>

*<sup>a</sup> School of Materials Science & Engineering, University of Jinan, Jinan, 250022, P. R. China*

Email: [mse\\_yuancz@ujn.edu.cn](mailto:mse_yuancz@ujn.edu.cn); [ayuancz@163.com](mailto:ayuancz@163.com)

*<sup>b</sup> School of Materials Science & Engineering, Anhui University of Technology, Ma'anshan, 243002, P. R. China*

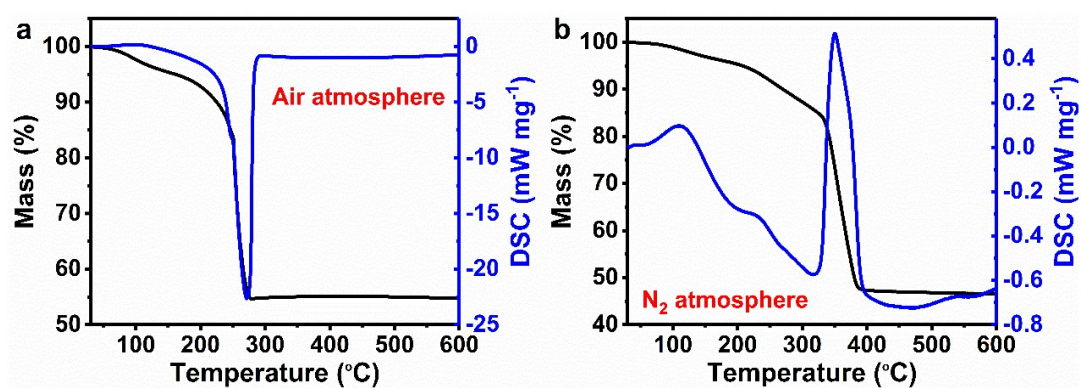

**Fig. S1** TG-DSC plots of (a) the NCGS in air, and (b) the pretreated product in N<sub>2</sub> with a temperature ramp of 10 °C min<sup>-1</sup>.

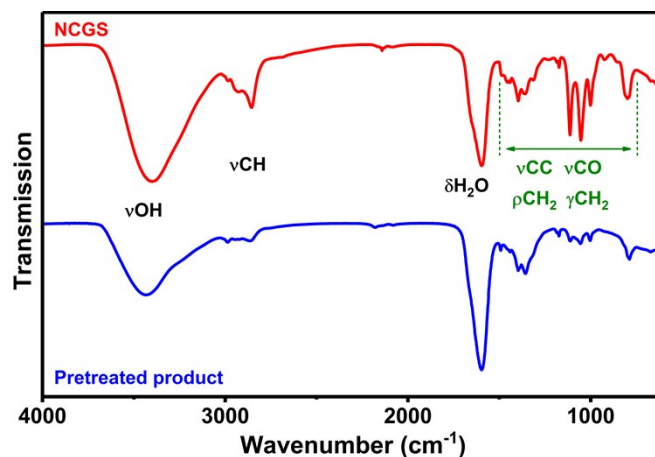

**Fig. S2** FT-IR spectra for the NCGS and pretreated product as indicated.

As shown in **Figure S2**, the strong absorption bands in the 2500 – 3000  $\text{cm}^{-1}$  are characteristic of the C-H stretching mode. The wide hump centered at 3400  $\text{cm}^{-1}$  and the sharp hump at 1600  $\text{cm}^{-1}$  are attributed to the  $\nu(\text{O-H})$  and  $\delta(\text{H}_2\text{O})$ . All the bands below 1500  $\text{cm}^{-1}$  are attributed to the  $\nu(\text{C-C})$ ,  $\nu(\text{C-O})$ ,  $\rho(\text{CH}_2)$ ,  $\gamma(\text{CH}_2)$  and metal-oxygen (M-O). After pretreated in air, the signals of other bands including  $\delta(\text{H}_2\text{O})$ ,  $\nu(\text{O-H})$ ,  $\nu(\text{C-H})$ ,  $\nu(\text{C-C})$ ,  $\nu(\text{C-O})$ ,  $\rho(\text{CH}_2)$  and  $\gamma(\text{CH}_2)$ , are weakened, which demonstrates the evaporation of absorbed water and oxidative decomposition of the organic moiety. Specifically, this characteristic M-O signal almost disappears in the pretreated product, indicating the pretreatment consumes a large amount of oxygen-enriched organic groups.

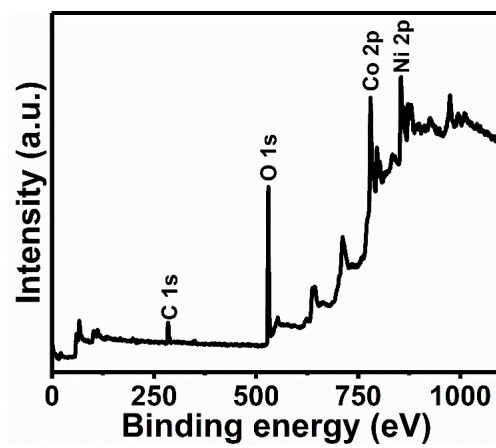

**Fig. S3** XPS full spectrum of the NCOHS.

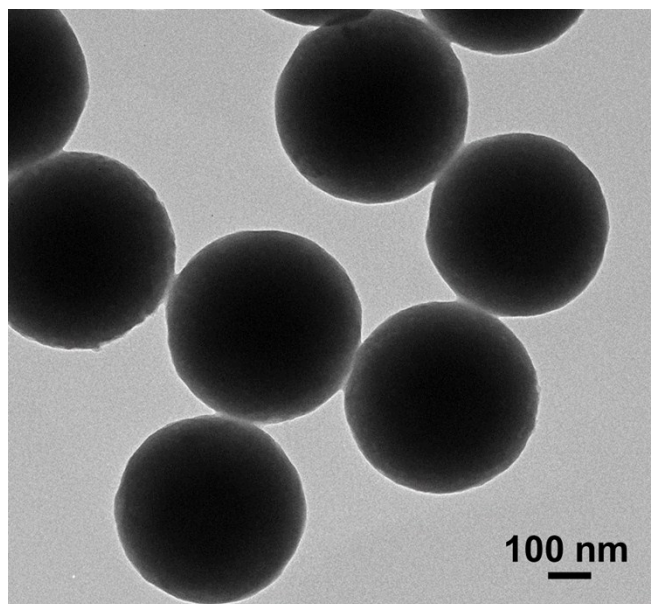

**Fig. S4** TEM image of pretreated product.

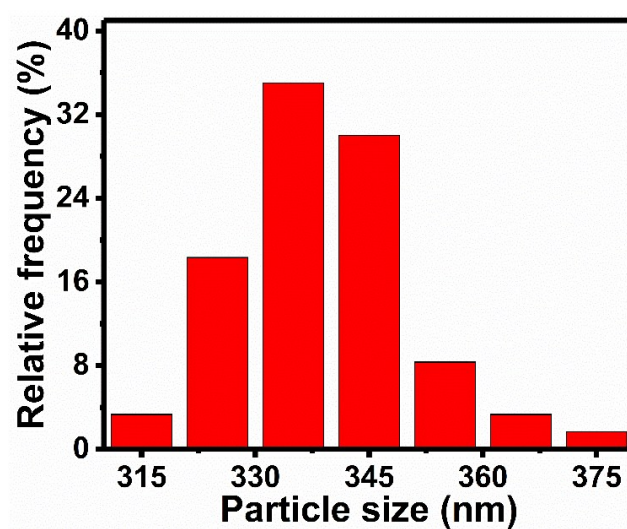

**Fig. S5** Corresponding particle size distribution diagram for the NCOHS.

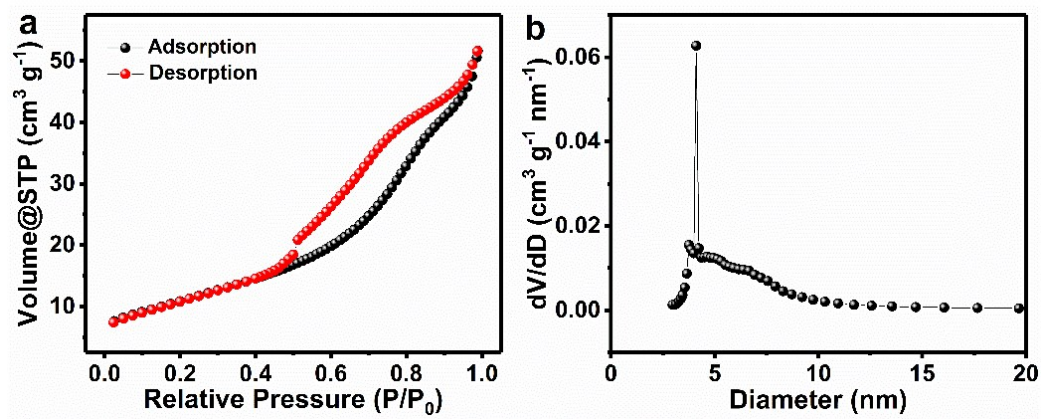

**Fig. S6** (a) N<sub>2</sub> sorption isotherms and (b) pore size distribution plot of the NCOHS.

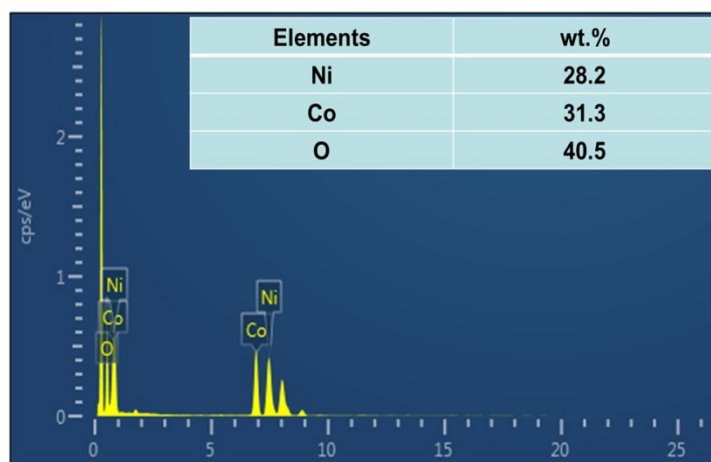

**Fig. S7** EDX spectrum and corresponding elemental ratio (the inset) of the NCOHS.



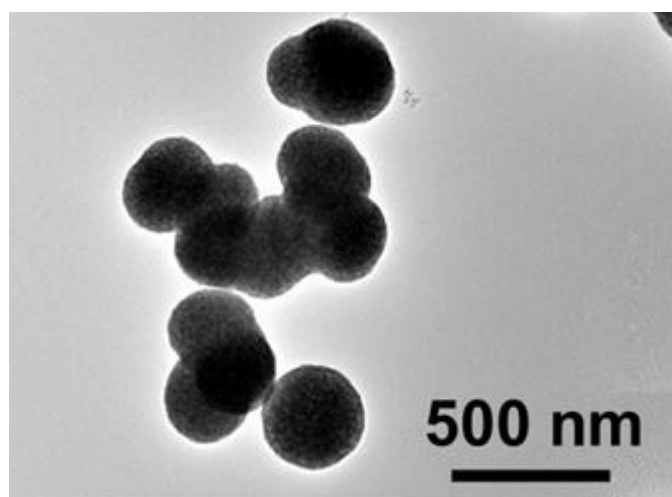

**Fig. S8** TEM image of the product obtained with the absence of the pretreatment in air.

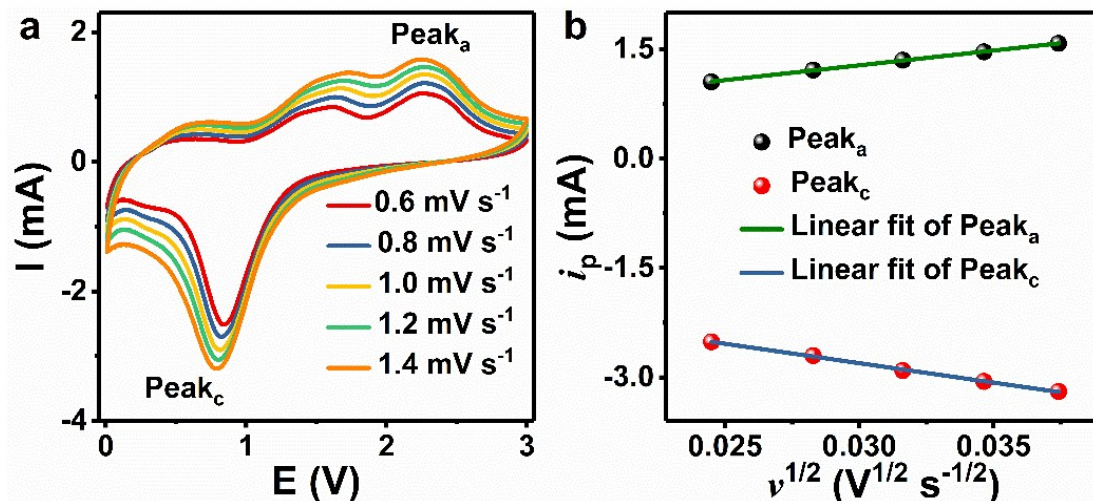

**Fig. S9** (a) CV curves at various scan rates, and (b) the relationship of the peak current ( $i_p$ ) of the Peak<sub>a</sub> and Peak<sub>c</sub> and the square root of scan rate ( $v^{1/2}$ ) of the NCOHS.

The chemical diffusion coefficient ( $D$ ) describes the transport property of mobile species, especially for diffusion of lithium in the lattice of the host electrode. The  $D$  value, indicative of intrinsic kinetic property of one electrode, can be calculated from the CV curves by using the Randles-Sevcik equation as follows:

$$i_p = 2.69 \times 10^5 n^{3/2} A D^{1/2} v^{1/2} \Delta C_0$$

where  $i_p$  is the peak current,  $n$  is the number of electrons per reaction species,  $A$  is the contact area between NCOHS and electrolyte (here the geometric area of electrode, 1.13 cm<sup>2</sup>, is used for simplicity),  $D$  is Li<sup>+</sup> diffusion coefficient,  $v$  is the scan rate,  $\Delta C_0$  is the change in Li<sup>+</sup> concentration during reaction. As derived from the CV curves of NCOHS (**Figure S9a**), the anodic peaks slightly shift to high potential and the cathodic peaks slightly shift to low potential with increasing scan rate. The peak  $i_p$  values of both Peak<sub>a</sub> and Peak<sub>c</sub> exhibit a linear relation with the  $v^{1/2}$  (**Figure S9b**). The Li<sup>+</sup> diffusion coefficient are estimated as high as  $3.66 \times 10^{-8}$  cm<sup>2</sup> s<sup>-1</sup> and  $6.32 \times 10^{-8}$  cm<sup>2</sup> s<sup>-1</sup> for the delithiation and lithiation process, respectively, which should benefit from the unique porous hollow nanostructure of the NCOHS.

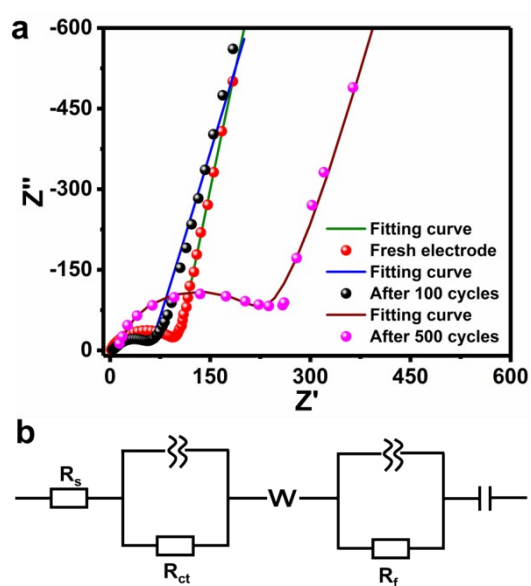

**Fig. S10** (a) Nyquist profiles and fitted plots of the NCOHS electrode at a fully charged state before, and after 100 and 500 cycles, and (b) corresponding equivalent circuit applied for fitting the EIS plots

**Table S1.** Comparisons in electrochemical performance of various Ni-Co-mixed metal oxides with the NCOHS electrode

| <b>Active materials</b>                                          | <b>Initial CE (%)</b>          | <b>Specific capacity (mAh g<sup>-1</sup>)</b> | <b>Reference</b>                         |
|------------------------------------------------------------------|--------------------------------|-----------------------------------------------|------------------------------------------|
| Single-crystal mesoporous CoNiO <sub>2</sub> microflower         | 65.6<br>0.1 A g <sup>-1</sup>  | ~397.4<br>110 cycles, 100 mA g <sup>-1</sup>  | <b>1</b><br>Electrochim. Acta            |
| Mesoporous CoNiO <sub>2</sub> hierarchical structures            | 65.6<br>0.1 A g <sup>-1</sup>  | ~449.3<br>50 cycles, 100 mA g <sup>-1</sup>   | <b>2</b><br>New J. Chem.                 |
| Spherical NiCoO <sub>2</sub> nanosheets@C                        | < 70<br>0.4 A g <sup>-1</sup>  | ~574<br>200 cycles, 400 mA g <sup>-1</sup>    | <b>3</b><br>Nano Energy                  |
| NiCoO <sub>2</sub> nanosheets nanotubes                          | < 70<br>0.2 A g <sup>-1</sup>  | < 300<br>100 cycles, 200 mA g <sup>-1</sup>   | <b>4</b><br>J. Mater. Chem. A            |
| NiCoO <sub>2</sub> /Carbon xerogel hybrids                       | 45.6<br>0.1 A g <sup>-1</sup>  | ~456<br>100 cycles, 100 mA g <sup>-1</sup>    | <b>5</b><br>Electrochim. Acta            |
| NiCoO <sub>2</sub> /Carbon nanofibers                            | 54.4<br>0.1 A g <sup>-1</sup>  | ~551.8<br>500 cycles, 500 mA g <sup>-1</sup>  | <b>6</b><br>Chem-Eur. J                  |
| NiCo <sub>2</sub> O <sub>4</sub> hollow spheres                  | 66<br>0.15 A g <sup>-1</sup>   | ~706<br>100 cycles, 200 mA g <sup>-1</sup>    | <b>7</b><br>Angew. Chem. Int. Ed.        |
| Hierarchical porous flower-like NiCo <sub>2</sub> O <sub>4</sub> | 70<br>0.1 A g <sup>-1</sup>    | ~640<br>60 cycles, 500 mA g <sup>-1</sup>     | <b>8</b><br>J. Mater. Chem. A            |
| Au nanoparticles @NiCo <sub>2</sub> O <sub>4</sub> nanotubes     | < 70<br>0.1 A g <sup>-1</sup>  | ~732.5<br>200 cycles, 100 mA g <sup>-1</sup>  | <b>9</b><br>Nano Energy                  |
| NiCo <sub>2</sub> O <sub>4</sub> microrod                        | < 70<br>0.1 A g <sup>-1</sup>  | ~719<br>600 cycles, 500 mA g <sup>-1</sup>    | <b>10</b><br>ACS Appl. Mater. Interfaces |
| NiCo <sub>2</sub> O <sub>4</sub> /Carbon textiles                | 76%<br>0.2 A g <sup>-1</sup>   | ~854<br>100 cycles, 500 mA g <sup>-1</sup>    | <b>11</b><br>Adv. Funct. Mater.          |
| NiCo <sub>2</sub> O <sub>4</sub> -rGO                            | 72.9%<br>0.1 A g <sup>-1</sup> | ~523<br>100 cycles, 200 mA g <sup>-1</sup>    | <b>12</b><br>J. Mater. Chem. A           |
| Ultralight nickel foam@NiCo <sub>2</sub> O <sub>4</sub>          | /<br>0.5 A g <sup>-1</sup>     | ~459<br>150 cycles, 500 mA g <sup>-1</sup>    | <b>13</b><br>J. Mater. Chem. A           |
| NiCo <sub>2</sub> O <sub>4</sub> /graphene nanosheet arrays      | /<br>0.1 A g <sup>-1</sup>     | ~806<br>55 cycles, 500 mA g <sup>-1</sup>     | <b>14</b><br>Nano Energy                 |
| NiCo <sub>2</sub> O <sub>4</sub> nanosheet                       | /<br>0.2 A g <sup>-1</sup>     | ~804.8<br>100 cycles, 200 mA g <sup>-1</sup>  | <b>15</b><br>Electrochim. Acta           |

|                                                                         |                       |                                    |                                |
|-------------------------------------------------------------------------|-----------------------|------------------------------------|--------------------------------|
| NiCo <sub>2</sub> O <sub>4</sub> microflowers                           | /                     | ~720                               | <b>16</b>                      |
|                                                                         | 0.1 A g <sup>-1</sup> | 100 cycles, 500 mA g <sup>-1</sup> | Electrochim. Acta              |
| rGO/ NiCo <sub>2</sub> O <sub>4</sub>                                   | 61%                   | ~656.5                             | <b>17</b>                      |
|                                                                         | 0.2 A g <sup>-1</sup> | 50 cycles, 500 mA g <sup>-1</sup>  | Adv. Energy Mater.             |
| Ni-Co-mixed oxide<br>nanoprisms                                         | 69.1%                 | /                                  | <b>18</b>                      |
|                                                                         | 0.2 A g <sup>-1</sup> | /                                  | Adv. Energy Mater.             |
| Ni <sub>x</sub> Co <sub>3-x</sub> O <sub>4</sub> hollow<br>microspheres | 70%                   | /                                  | <b>19</b>                      |
|                                                                         | 0.1 A g <sup>-1</sup> | /                                  | Small                          |
| Ni <sub>x</sub> Co <sub>3-x</sub> O <sub>4</sub> nanorods               | 68.4%                 | /                                  | <b>20</b>                      |
|                                                                         | 0.1 A g <sup>-1</sup> | /                                  | Adv. Funct. Mater.             |
| Porous Ni <sub>x</sub> Co <sub>3-x</sub> O <sub>4</sub><br>nanosheets   | 54%                   | /                                  | <b>21</b>                      |
|                                                                         | 0.1 A g <sup>-1</sup> | /                                  | ACS Appl. Mater.<br>Interfaces |
| NiCoO <sub>2</sub> hollow spheres                                       | 70.5%                 | ~805.9                             | <b>Our work</b>                |
|                                                                         | 0.2 A g <sup>-1</sup> | 750 cycles, 500 mA g <sup>-1</sup> |                                |

#### References:

- [1] Y. G. Liu, Y. Y. Zhao, Y. L. Yu, M. Ahmad and H. Y. Sun, *Electrochim. Acta*, 2014, **132**, 404.
- [2] Y. G. Liu, Y. Y. Zhao, Y. L. Yu, J. P. Li, M. Ahmad and H. Y. Sun, *New J. Chem.*, 2014, **38**, 3084.
- [3] J. Liang, K. Xi, G. Q. Tan, S. Chen, T. Zhao, P. R. Coxon, H. -K. Kim, S. J. Ding, Y. Yang, R. V. Kumar and J. Lu, *Nano Energy*, 2016, **27**, 457.
- [4] X. Xu, B. T. Dong, S. J. Ding, C. H. Xiao and D. M. Yu, *J. Mater. Chem. A*, 2014, **2**, 13069.
- [5] Z. W. Zhang, Q. Li, Z. Q. Li, J. Y. Ma, C. X. Li, L. W. Yin and X. P. Gao, *Electrochim. Acta*, 2016, **203**, 117.
- [6] Z. L. Wang, Z. W. Zhao, Y. R. Zhang, X. P. Yang, X. Sun, J. Y. Zhang, L. R. Hou and C. Z. Yuan, *Chem. Eur. J.*, 2019, **25**, 863.
- [7] L. F. Shen, L. Yu, X. Y. Yu, X. G. Zhang and X. W. Lou, *Angew. Chem. Int. Ed.*, 2015, **54**, 1868.
- [8] L. L. Li, Y. L. Cheah, Y. W. Ko, P. F. Teh, G. Wee, C. L. Wong, S. J. Peng and M. Srinivasan,

- J. Mater. Chem. A*, 2013, **1**, 10935.
- [9] J. Zhu, Z. Xu and B. A. Lu, *Nano Energy*, 2014, **7**, 114.
- [10] F. Fu, J. D. Li, Y. Z. Yao, X. P. Qin, Y. B. Dou, H. Y. Wang, J. K. Tsui, K. -Y. Chan and M. H. Shao, *ACS Appl. Mater. Interfaces*, 2017, **9**, 16194.
- [11] L. F. Shen, Q. Che, H. S. Li and X. G. Zhang, *Adv. Funct. Mater.*, 2014, **24**, 2630.
- [12] Y. J. Chen, M. Zhuo, J. W. Deng, Z. Xu, Q. H. Li and T. H. Wang, *J. Mater. Chem. A*, 2014, **2**, 4449.
- [13] J. Pu, Z. Q. Liu, Z. H. Ma, J. Wang, L. Zhang, S. Z. Chang, W. L. Wu, Z. H. Shen and H. G. Zhang, *J. Mater. Chem. A*, 2016, **4**, 17394.
- [14] Y. J. Chen, J. Zhu, B. H. Qu, B. G. Lu and Z. Xu, *Nano Energy*, 2014, **3**, 88.
- [15] Y. Q. Zhu and C. B. Cao, *Electrochim. Acta*, 2015, **176**, 141.
- [16] J. M. Xu, L. He, W. Xu, H. B. Tang, H. Liu, T. Han, C. J. Zhang and Y. H. Zhang, *Electrochim. Acta*, 2014, **145**, 185.
- [17] G. X. Gao, H. B. Wu and X. W. Lou, *Adv. Energy Mater.*, 2014, **6**, 1400422.
- [18] L. Yu, B. Y. Guan, W. Xiao and X. W. Lou, *Adv. Energy Mater.*, 2015, **5**, 1500981.
- [19] L. L. Wu, Z. Wang, Y. Long, J. Li, Y. Liu, Q. S. Wang, X. Wang, S. Y. Song, X. G. Liu and H. J. Zhang, *Small*, 2017, **9**, 1604270.
- [20] H. Li, M. Liang, W. W. Sun and Y. Wang, *Adv. Funct. Mater.*, 2016, **26**, 1098.
- [21] F. C. Zheng, D. Q. Zhu and Q. W. Chen, *ACS Appl. Mater. Interfaces*, 2014, **6**, 9256.

**Table S2.** EIS Fitting data of the NCOHS electrode

|          | Fresh electrode (Ohm) | After 100 cycles (Ohm) | After 500 cycles (Ohm) |
|----------|-----------------------|------------------------|------------------------|
| $R_s$    | 1.3                   | 3.9                    | 13.8                   |
| $R_{ct}$ | 98.6                  | 76.8                   | 258.6                  |
